# Supplementary material
Source: MDPI journal article supplement (https://www.mdpi.com/2227-7102/11/6/261)
Supplement: s1 [file s1]

**Table S3. Summary of less prominent TDF domains, themes and sample quotes from focus groups and interviews with students**

| TDF Domain | Key Findings                                                                                                                                                                                                                                                                                                                                                                 | Quotes                                                                                                                                                                                                                                                                                                                                                                                                                                                                                                                                                                                                                                                                                                                                                                             |
|------------|------------------------------------------------------------------------------------------------------------------------------------------------------------------------------------------------------------------------------------------------------------------------------------------------------------------------------------------------------------------------------|------------------------------------------------------------------------------------------------------------------------------------------------------------------------------------------------------------------------------------------------------------------------------------------------------------------------------------------------------------------------------------------------------------------------------------------------------------------------------------------------------------------------------------------------------------------------------------------------------------------------------------------------------------------------------------------------------------------------------------------------------------------------------------|
| Emotions   | <p>Some English students expressed negative emotions at being told off by teachers for not following hygiene rules</p> <p>Some students in Hungary did not find food hygiene interesting</p> <p>Most students were positive about cooking and enjoyed practical lessons</p>                                                                                                  | <p><i>"So, say if I've made something before at home I'll have my own way of making it and then the teachers might say that it's wrong and then it always goes bad". (England)</i></p> <p><i>"I don't care at all" (Hungary)</i></p> <p><i>"Me neither".</i></p> <p><i>"I don't know, this is not interesting for me". (Hungary)</i></p> <p><i>"I enjoy it". (England)</i></p> <p><i>"I just enjoy the practical".</i></p> <p><i>"Kind of satisfaction with what you've made" (England)</i></p> <p><i>Interviewer: "The themes which concern your health, in general, it interests you to the school?"</i></p> <p><i>"Because we know it's not useless, that it's important!" (France)</i></p>                                                                                     |
| Intentions | <p>Students in England generally showed good intentions to maintain good personal hygiene</p> <p>Students in Hungary also wanted to maintain good personal hygiene if they had the opportunity to</p> <p>French students had intentions to establish daily hygiene habits</p> <p>Some English students were not sure about taking up a food related career in the future</p> | <p><i>"I'll always wash my equipment before I use it". (England)</i></p> <p><i>Interviewer: "When you eat, before eating, do you pay special attention to something"? (Hungary)</i></p> <p><i>"To wash hands".</i></p> <p><i>"If there is a possibility, hand washing"</i></p> <p><i>Interviewer: "And if no, it doesn't matter"?</i></p> <p><i>"No. If there is no possibility... I will not miss eating just because of it". (Hungary)</i></p> <p><i>"When I learn something, really different or unusual in class, I tend to talk about it at dinner time with my parents when I get home". (France)</i></p> <p><i>"Kind of, because I'm not completely sure yet what job I will have in the future, but I do think, I did think of some options for myself". (England)</i></p> |

|                                         |                                                                                                                                                                                                                                                                                                                                                         |                                                                                                                                                                                                                                                                                                                                                                                                                                                                                                                                                                                                                                                                                                                                                                                                                                              |
|-----------------------------------------|---------------------------------------------------------------------------------------------------------------------------------------------------------------------------------------------------------------------------------------------------------------------------------------------------------------------------------------------------------|----------------------------------------------------------------------------------------------------------------------------------------------------------------------------------------------------------------------------------------------------------------------------------------------------------------------------------------------------------------------------------------------------------------------------------------------------------------------------------------------------------------------------------------------------------------------------------------------------------------------------------------------------------------------------------------------------------------------------------------------------------------------------------------------------------------------------------------------|
| Goals                                   | <p>Some students in England and Portugal had considered taking a food-related career in the future</p> <p>English students expressed an interest in learning about food and gaining life skills</p> <p>Students in Hungary felt it was important to learn about this from a young age</p>                                                               | <p><i>"I'd like to have a bakery. But I was going to do something else for the meantime and then do that in the background until it's big enough to become full time". (England)</i></p> <p><i>"My dream is being a chef. I've always like to cook and I'd like to cook for others". (Portugal)</i></p> <p><i>"In other subjects there's not a lot of life skills whereas with food, although it may seem like an easier subject it's not, because you learn something that will be with you for the rest of your life". (England)</i></p> <p><i>"It would be great for everybody if they knew what they consume. For example, not only in a university level but also in primary and secondary school to learn about these issues". (Hungary)</i></p>                                                                                       |
| Optimism                                | <p>English students felt food hygiene was a break from academic subjects. Some students, especially in France, perceived themselves as health conscious and wanted to learn about food hygiene</p> <p>Most students felt food subjects were more practical and enjoyable compared to academic subjects and provided them with important life skills</p> | <p><i>"I took it because I could break between all the maths and science and stuff" (England)</i></p> <p><i>Interviewer: "Do you think it's important, food hygiene"? (France)</i><br/> <i>"Yes, it's important"!</i><br/> <i>"Learning to choose food, uh ... because we see a lot of reports on what is bad ... we need to know how to sort ourselves"! (France)</i></p> <p><i>"Because it's a life skill and you're going to use it throughout the whole of your life because there's never going to be a point in your life where you're not going to eat food" (England)</i></p> <p><i>"For example, we could avoid illnesses, with hygiene, we knew better how to handle, it would help us very much". (Hungary)</i></p> <p><i>"If I move, I will need it, I want to cook on my own, but right now I don't need it". (Hungary)</i></p> |
| Memory attention and decision processes | <p>Students in England often remembered some hygiene rules and did them automatically</p> <p>All students commented on the difficulty of remembering microbe names</p>                                                                                                                                                                                  | <p><i>"Some of them [remember some hygiene rules, e.g. handwashing] (England)</i><br/> <i>"Just do them [routines]</i><br/> <i>"Automatic reaction, do you know what I mean"? (England)</i></p> <p><i>Interviewer: "Have you ever talked about microbes, viruses, bacteria"? (Portugal)</i><br/> <i>"Yes".</i><br/> <i>"Which one? Do you remember names"?</i></p>                                                                                                                                                                                                                                                                                                                                                                                                                                                                           |

|                        |                                                                                                                                                                                                                                        |                                                                                                                                                                                                                                                                                                                                                                                                                                                                                                                                 |
|------------------------|----------------------------------------------------------------------------------------------------------------------------------------------------------------------------------------------------------------------------------------|---------------------------------------------------------------------------------------------------------------------------------------------------------------------------------------------------------------------------------------------------------------------------------------------------------------------------------------------------------------------------------------------------------------------------------------------------------------------------------------------------------------------------------|
|                        | <p>English students paid attention to food hygiene ratings for food establishments and this influenced decision-making on whether to visit</p> <p>French students commented that repetition helps them to remember things</p>          | <p><i>"No. It was in the first period". (Portugal)</i></p> <p><i>"I feel like most of the time you know you can see the food hygiene rating so they're like, they get checked out so I think well it must be OK unless they've got a really low one". (England)</i></p> <p><i>"When nobody washes their hands before the canteen [or other situations], you're not encouraged to do so even though the equipment is present" (France)</i></p> <p><i>"When you show something several times, it comes to mind"! (France)</i></p> |
| Behavioural regulation | <p>Across countries, students' behaviour was governed by rules, sanctions and warnings from teachers and parents</p> <p>In France students followed hygiene rules and were accompanied to the toilets to check correct handwashing</p> | <p><i>"I walk into the kitchen here, put an apron on, wash my hands, hair up, otherwise miss will tell us off". (England)</i></p> <p><i>"After going to the bathroom, they accompanied us, they put us in a line ... they put the soap on our hands and they checked". (France)</i></p>                                                                                                                                                                                                                                         |
