# Supplementary material
Source: MDPI journal article supplement (https://www.mdpi.com/2227-7102/11/6/261)
Supplement: s1 [file s1]

**Table S1: National curriculum analysis for food hygiene and food safety education in seven European countries**

|                                   | <b>England</b>                                                                                                                 | <b>Hungary</b>                                                                                                                                                                                                                  | <b>Greece</b>                                                                                                                               | <b>France</b>                                                                                                                                                                                               | <b>Portugal</b>                                                                                                     | <b>Spain</b>                                 | <b>Denmark</b>                                                                     |
|-----------------------------------|--------------------------------------------------------------------------------------------------------------------------------|---------------------------------------------------------------------------------------------------------------------------------------------------------------------------------------------------------------------------------|---------------------------------------------------------------------------------------------------------------------------------------------|-------------------------------------------------------------------------------------------------------------------------------------------------------------------------------------------------------------|---------------------------------------------------------------------------------------------------------------------|----------------------------------------------|------------------------------------------------------------------------------------|
| <b>Spoilage and contamination</b> | <b>14-18yrs</b><br>Food safety<br>(Spoilage and contamination)                                                                 | <b>10-12yrs</b><br>Temperature dependence:<br>Food safety rules, relationship of food spoilage with cooking, baking, cooling processes<br><br><b>14- 16yrs</b><br>Relationship between life cycle of bacteria and food spoilage | <b>16-18yrs</b><br>Food microbiology and food poisoning<br><br><b>&gt;18yrs</b><br>Food contamination, Biological-Chemical-Physical Hazards | <b>11-18yrs</b><br>Health education<br><br><b>11-14yrs</b><br>Food contamination<br>Food safety<br><br><b>15-18yrs</b><br>Sanitary quality (microbial contamination)<br>Food quality control<br>Food safety | None reported                                                                                                       | <b>&gt;17yrs</b><br>Environmental protection | <b>10-14yrs</b><br>Food quality awareness<br><br><b>10-14yrs</b><br>Food labelling |
| <b>Microorganisms and enzymes</b> | <b>14 – 18yrs</b><br>Microbiological food safety considerations when preparing, processing, storing, cooking and serving foods | <b>12-15yrs</b><br>Relationship between bacteria and food (e.g. yoghurt)<br><br><b>12-15yrs</b>                                                                                                                                 | <b>16-18yrs</b><br>Microorganisms causing food poisoning and how to avoid food poisoning                                                    | <b>11-18yrs</b><br>Health education<br><br><b>11-14yrs</b><br>Microorganisms in food production and preservation                                                                                            | <b>10-18yrs</b><br>Different types of organisms<br><br><b>15-18yrs</b><br>Food fermentation and enzymatic activity. | None reported                                | None reported                                                                      |

|                                               |                                                                                                                    |                                                                                        |                                                                                                            |                                                                                                                                                            |                                                                                                                                     |                                                        |                                            |
|-----------------------------------------------|--------------------------------------------------------------------------------------------------------------------|----------------------------------------------------------------------------------------|------------------------------------------------------------------------------------------------------------|------------------------------------------------------------------------------------------------------------------------------------------------------------|-------------------------------------------------------------------------------------------------------------------------------------|--------------------------------------------------------|--------------------------------------------|
|                                               |                                                                                                                    | Effect of biology on food industry and agriculture, Infections, epidemics, hygiene     |                                                                                                            | <b>15-18yrs</b><br>Sanitary quality (microbial contamination)<br>Food preservation<br>Microbiological quality<br>Prevent transmission of infectious agents | Microorganisms and food industry.<br><br><b>12-18yrs</b><br>Human microbiota                                                        |                                                        |                                            |
| <b>Buying storing and cooking food safely</b> | <b>14 – 18yrs</b><br>Food safety – buying, storing and cooking food safely.<br>Preparation and cooking techniques. | <b>10 –12yrs</b><br>Food preparation, preservation procedures, management of leftovers | <b>Adult education –</b><br>CPD<br>Food preservation, and safety, preparing, packaging and dispensing food | <b>11-18yrs</b><br>Health education<br><br><b>15-18yrs</b><br>Food transport, storage and conservation                                                     | <b>15-18yrs</b><br>How products are transported; how food is preserved<br>Preservation<br>Improvement and production of novel foods | <b>&gt;17yrs</b><br>Elaboration of products, packaging | <b>10-14yrs</b><br>Cooking, food labelling |
| <b>Personal hygiene</b>                       | <b>14 – 18yrs</b><br>Personal hygiene, safe food handling practices                                                | <b>10-12yrs</b><br>Rules of personal hygiene and hygiene of kitchen tools              | <b>&gt;18yrs</b><br>Personal health                                                                        | <b>11-18yrs</b><br>Health education<br><br><b>11-14yrs</b><br>Prevent contamination/infection (hygiene rules)                                              | <b>10-12yrs</b><br>Healthy lifestyle<br>Personal hygiene<br>Body hygiene                                                            | None reported                                          | None reported                              |

|                                      |                                                                              |                                                      |                                                                                        |                                                                                                                                                                                                                                           |                                                                            |               |               |
|--------------------------------------|------------------------------------------------------------------------------|------------------------------------------------------|----------------------------------------------------------------------------------------|-------------------------------------------------------------------------------------------------------------------------------------------------------------------------------------------------------------------------------------------|----------------------------------------------------------------------------|---------------|---------------|
|                                      |                                                                              |                                                      |                                                                                        | <b>15-18yrs</b><br>Prevent transmission of infectious agents<br>Hand hygiene                                                                                                                                                              |                                                                            |               |               |
| <b>Keeping work areas clean</b>      | <b>14 – 18yrs</b><br>Health, safety and hygiene requirements in working area | <b>10-12yrs</b><br>Hygiene of kitchen tools          | <b>&gt;18yrs</b><br>Cleaning and Disinfection, Hygiene of Establishments and Equipment | <b>11-18yrs</b><br>Health education<br><br><b>11-14yrs</b><br>Limit proliferation of pathogenic microorganisms (antiseptics)<br><br><b>15-18yrs</b><br>Surface hygiene control<br>Microbiological quality of surfaces<br>Surface cleaning |                                                                            | None reported | None reported |
| <b>Food storage and preservation</b> | <b>14 – 18yrs</b><br>Stocking your store cupboard, fridge and freezer        | <b>12-15yrs</b><br>Storage and preservation of food. | <b>&gt;18yrs</b><br>Food preservation and safety                                       | <b>11-18yrs</b><br>Health education<br><br><b>15-18yrs</b>                                                                                                                                                                                | <b>15-18yrs</b><br>Preservation, improvement and production of novel foods | None reported | None reported |

|  |                                   |  |                                  |                                                                                                                                                  |  |
|--|-----------------------------------|--|----------------------------------|--------------------------------------------------------------------------------------------------------------------------------------------------|--|
|  | <b>16-19yrs</b><br>Storage rules. |  | Food storage and<br>conservation | <b>10-12yrs</b><br>Recognise the<br>importance of<br>science and<br>technology in the<br>evolution of food<br>products and their<br>preservation |  |
|--|-----------------------------------|--|----------------------------------|--------------------------------------------------------------------------------------------------------------------------------------------------|--|

Note: Years shortened to yrs for age group of student
