# Supplementary material
Source: MDPI journal article supplement (https://www.mdpi.com/2227-7102/11/6/261)
Supplement: s1 [file s1]

Archive with 5 entries (5 files):
- Supplementary 1 topic Guide for Students.pdf
- Supplementary 2 COREQ checklist.pdf
- Table S1.pdf
- Table S2.pdf
- Table S3.pdf
